# Supplementary material for: Structure and applications of novel influenza HA tri-stalk protein for evaluation of HA stem-specific immunity
Source: PubMed Central journal article supplement (PMC6160157; doi:10.1371/journal.pone.0204776), 2018-09-27

**A**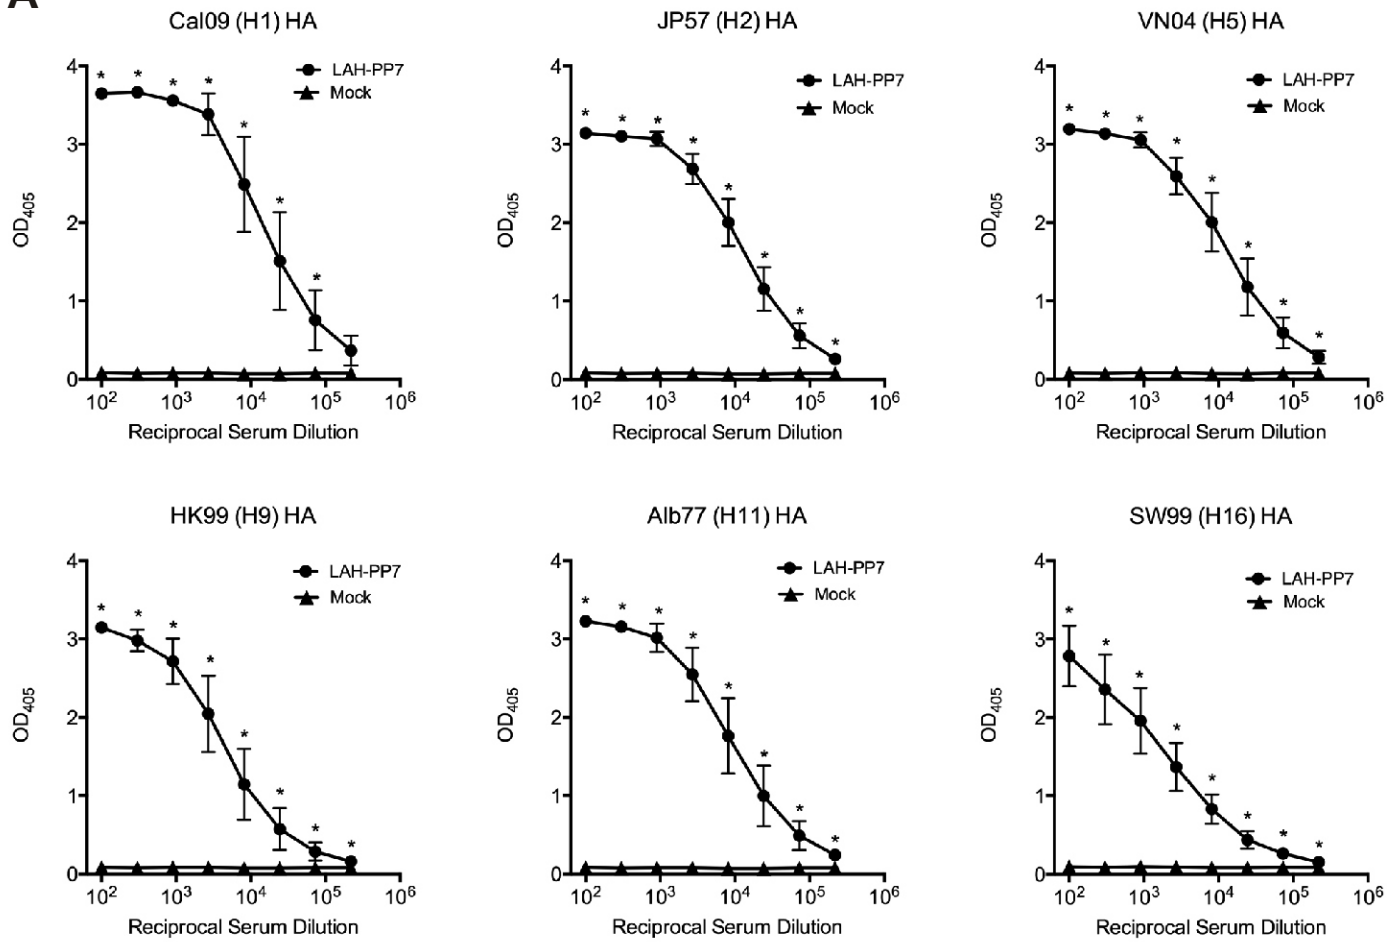**B**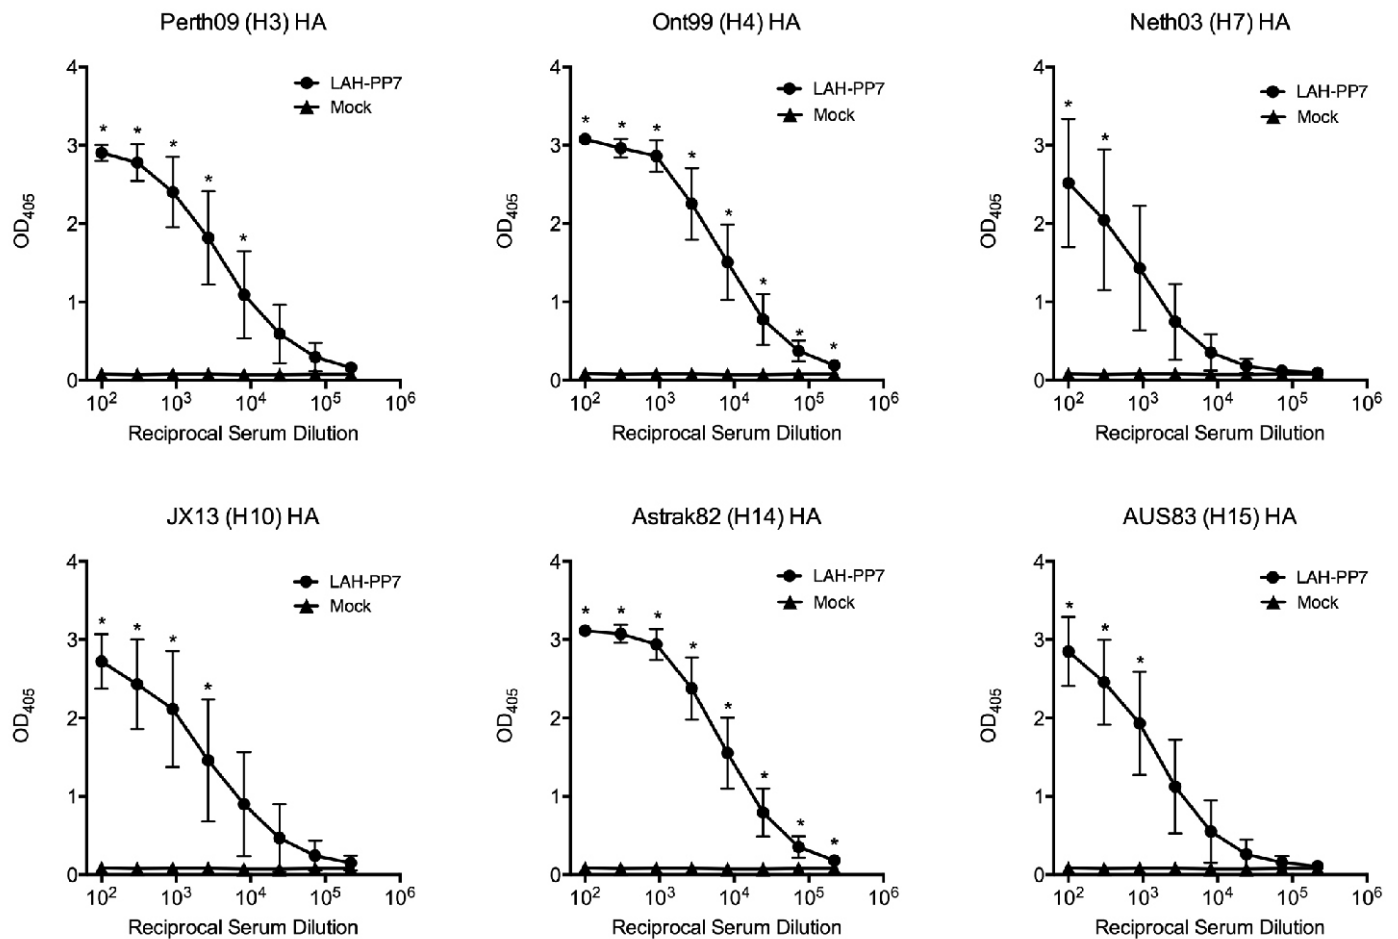

Supplement: pone.0204776.s002.pdf [file pone.0204776.s002.pdf]
